# Supplementary material for: Altered glucose metabolism and hypoxic response in alloxan-induced diabetic atherosclerosis in rabbits
Source: PLoS One. 2017 Apr 14;12(4):e0175976. doi: 10.1371/journal.pone.0175976 (PMC5391952; doi:10.1371/journal.pone.0175976)
Supplement: S3 Table — (XLSX) [file pone.0175976.s003.xlsx]

## Sheet: Sheet1
Additional table 3. Hierarchical clustering analysis
Line	ID	HMT DB †			m/z	MT	Standardized Relative Area §
		Compound name	KEGG ID	HMDB ID			Non-DM, non-injured artery					Non-DM, atherosclerotic artery					DM, atherosclerotic artery
1	A_0013	Hexanoic acid	C01585	HMDB00535	115.076	8.91067	0.0467436	-0.297117	-2.65191	-1.50763	1.04882	0.355545	0.437133	1.39667	0.63044	0.712519	-0.384717	0.00821407	-0.253392	0.31045	0.148222
2	A_0019	Heptanoic acid	No ID	HMDB00666	129.092	8.59502	-0.552764	-0.229958	-1.43996	-2.00841	0.130163	-0.591084	1.48636	1.61741	0.969216	0.568854	-0.553534	-0.168626	0.390219	0.700805	-0.31869
3	A_0026	Octanoic acid	C06423	HMDB00482	143.107	8.32985	-0.556038	0.285812	-0.819509	-2.06571	0.380908	-0.715627	0.759005	1.57847	1.53151	0.236368	-1.36864	-0.0300426	0.544338	0.534979	-0.295831
4	A_0030	Pelargonic acid	C01601	HMDB00847	157.123	8.11643	-1.23913	-0.3337	-0.841171	-1.61761	0.756351	-0.675082	0.974465	1.4796	1.47806	0.745903	-1.27472	-0.254019	0.614684	0.228663	-0.0423003
5	A_0038	Decanoic acid	C01571	HMDB00511	171.138	7.92574	-1.70311	0.211767	-1.26789	-1.72539	0.610858	0.117171	0.0711708	-0.0872186	1.39165	-0.196139	-0.458866	-0.109654	1.51977	1.1603	0.465585
6	C_0078	N-Acetylornithine	C00437	HMDB03357	175.108	11.5564	-1.10421	-1.10421	-1.10421	-1.10421	-1.10421	2.27813	0.209867	-0.166905	0.657015	0.370275	0.116185	-0.104447	1.08922	0.915326	0.156361
7	C_0092	ADMA	C03626	HMDB01539	203.149	8.98469	-1.12158	-1.23721	-1.34293	-1.11789	-1.04791	1.62087	0.995748	0.352046	0.430205	1.53703	0.330379	-0.350541	0.598965	0.418141	-0.0653167
8	C_0088	Nω-Methylarginine	No ID	No ID	189.134	8.69207	-1.12958	-1.12958	-1.12958	-1.12958	-1.12958	1.81755	0.813677	0.753214	0.989405	1.30721	-0.0742672	-0.467832	0.365036	0.19785	-0.0539664
9	C_0071	Methionine sulfoxide	C02989	HMDB02005	166.052	14.8898	-1.26336	-1.26336	-1.26336	-1.26336	-1.26336	1.49273	0.423823	1.01207	0.911035	0.723412	0.424067	-0.177	0.822675	0.578909	0.105074
10	C_0079	Arg	C00062,C00792	HMDB00517,HMDB03416	175.119	8.24959	-1.11655	-1.38872	-1.5987	-1.15646	-1.08427	1.1113	0.422642	0.615546	0.434951	0.849765	0.446179	-0.194211	1.34318	0.927928	0.387427
11	C_0062	Met	C00073,C00855,C01733	HMDB00696	150.058	13.2863	-1.24338	-1.27663	-1.34185	-1.18864	-1.19328	0.945622	0.566121	0.489834	0.877387	1.35504	0.251971	-0.342045	1.16973	0.734289	0.195841
12	A_0020	N-Acetyl-β-alanine	C01073	No ID	130.051	8.86153	-1.22842	-1.22842	-1.22842	-1.22842	-1.22842	1.03822	0.42557	0.573832	0.900284	0.971826	-0.0401395	-0.325505	1.55448	0.668679	0.374873
13	C_0094	Spermine	C00750	HMDB01256	203.222	4.95783	-0.948111	-0.948111	-0.948111	-0.948111	-0.948111	-0.185174	0.987694	1.12184	0.151874	1.37044	-0.482446	-0.948111	1.82022	-0.0389277	0.94314
14	C_0050	Adenine	C00147	HMDB00034	136.061	8.9296	-0.97743	-1.02584	-1.09971	-1.0997	-0.990508	-0.487354	0.373893	2.17792	0.80069	0.632106	0.00409514	-0.084531	1.54741	0.155156	0.0738089
15	A_0067	Ribulose 1,5-diphosphate	C01182	No ID	308.977	16.0078	-1.18205	-1.18205	-1.18205	-1.18205	-1.18205	-0.177344	1.03812	1.44449	0.938519	0.454556	0.330191	-0.269069	1.53274	0.242418	0.375656
16	C_0068	2-Aminoadipic acid	C00956	HMDB00510	162.076	13.6296	-1.02409	-1.47872	-1.6279	-1.18369	-0.901001	0.13383	0.961581	0.981998	0.868296	0.71019	0.484743	-0.0765968	1.51395	0.304309	0.3331
17	A_0011	Fumaric acid	C00122	HMDB00134	115.004	26.8306	-1.42819	-1.42819	-1.42819	-1.05596	-1.081	-0.0441941	0.817924	1.07459	0.856328	0.826904	0.405875	0.378682	0.965513	1.05184	0.0880702
18	C_0025	Pro	C00148,C00763,C16435	HMDB00162,HMDB03411	116.071	13.4112	-1.2678	-1.35961	-1.42592	-1.2044	-1.20986	0.391651	0.646161	0.885551	0.581027	1.03454	0.460392	-0.0912536	1.19178	1.04274	0.325003
19	C_0034	Nicotinamide	C00153	HMDB01406	123.055	8.62759	-1.2088	-1.30847	-1.27838	-1.29982	-1.1857	0.138455	0.81991	1.31004	0.736695	1.05277	0.0455923	-0.164152	1.12223	0.665472	0.554156
20	C_0114	Inosine	C00294	HMDB00195	269.087	28.7399	-1.34074	-1.34368	-1.42786	-1.34068	-0.621986	-0.0930199	0.854451	1.46388	1.06097	0.957477	0.0037989	-0.086836	0.638673	0.535804	0.739752
21	C_0117	Guanosine	C00387	HMDB00133	284.098	16.061	-1.48117	-1.26958	-1.35703	-1.48312	-0.623031	0.123285	0.906975	1.40641	1.05716	1.02025	0.343185	-0.00893524	0.593369	0.279891	0.49234
22	A_0021	Malic acid	C00149,C00497,C00711	HMDB00156,HMDB00744	133.013	22.3085	-1.17993	-1.23545	-1.33189	-1.12301	-1.03357	-0.0370896	0.993648	1.81025	0.976274	1.03188	-0.0647623	-0.101535	0.548282	0.597544	0.14935
23	C_0017	Choline	C00114	HMDB00097	104.107	7.89766	-1.16531	-1.21242	-1.22036	-1.18861	-1.10422	0.0127172	1.22748	1.48943	1.06282	1.24799	0.033201	-0.131648	0.490107	0.599904	-0.141089
24	C_0003	Ethanolamine	C00189	HMDB00149	62.0608	7.26993	-1.23429	-1.17463	-1.29533	-1.24442	-1.20654	-0.123132	1.30525	1.14757	0.806049	1.17229	0.478434	-0.142138	0.718839	0.767053	0.0249913
25	C_0123	Thiamine phosphate	C01081	HMDB02666	345.079	13.2678	-1.22407	-1.22407	-1.22407	-1.22407	-1.22407	0.0383262	1.06435	1.41518	1.03139	1.19028	0.497739	-0.114085	0.771624	0.180192	0.0453453
26	A_0062	6-Phosphogluconic acid	C00345	HMDB01316	275.016	14.9702	-1.09528	-1.09528	-1.09528	-1.09528	-1.09528	0.0198385	1.20084	1.27882	1.58201	1.35725	0.0936213	-0.313798	0.633456	-0.1798	-0.19585
27	C_0119	Argininosuccinic acid	C03406	HMDB00052	291.13	11.3873	-1.12749	-1.23445	-1.36069	-0.968839	-1.02744	0.246369	0.898905	1.44282	1.34378	1.26157	-0.00260714	-0.561704	0.801479	0.221461	0.0668256
28	C_0069	Carnitine	C00318,C00487,C15025	HMDB00062	162.112	10.1253	-0.864855	-1.37056	-1.69779	-0.802699	-0.509204	-0.56789	1.07879	1.5361	0.757748	1.56549	0.514101	-0.365099	0.467875	0.311816	-0.0538157
29	C_0029	Betaine	C00719	HMDB00043	118.086	14.111	-0.972057	-1.33763	-1.61362	-1.02338	-0.814431	0.167509	1.21547	1.48051	0.87327	1.2771	0.374212	-0.16173	-0.339696	0.750776	0.123697
30	C_0047	Ornithine	C00077,C00515,C01602	HMDB00214,HMDB03374	133.097	7.86224	-0.419482	-1.62552	-2.05222	-0.7302	-0.442717	0.24657	1.82753	1.02595	0.494958	0.80097	0.646989	-0.113723	-0.241128	0.638941	-0.0569136
31	A_0037	Glycerol 3-phosphate	C00093	HMDB00126	171.006	12.2251	-1.07345	-1.16258	-1.13701	-1.09448	-0.978442	-0.524551	1.47401	1.54744	0.88209	1.2053	0.109336	0.196131	0.319756	0.748379	-0.511937
32	C_0014	N,N-Dimethylglycine	C01026	HMDB00092	104.07	13.5914	-0.981217	-1.19462	-1.75678	-0.788136	-0.686852	-0.423898	1.16842	1.34109	0.665139	0.843479	-0.251399	0.515838	0.276937	1.563	-0.291
33	C_0059	Gln	C00064,C00303,C00819	HMDB00641,HMDB03423	147.076	13.3286	-0.471036	-1.42357	-2.0101	-0.567551	-1.00641	-0.408091	0.771064	1.21875	1.06872	0.865753	-0.0955977	-0.0252884	0.984472	1.12181	-0.0229314
34	A_0025	Ethanolamine phosphate	C00346	HMDB00224	140.011	8.01607	-0.273381	-1.45266	-1.9815	-0.774828	-0.785014	-0.533838	0.356028	0.91791	0.430162	0.785871	0.323891	-0.0623708	1.92503	0.852293	0.272403
35	C_0061	Glu	C00025,C00217,C00302	HMDB00148,HMDB03339	148.06	13.5793	-0.818055	-1.41812	-1.82271	-0.866881	-0.816194	-0.56428	0.636655	1.25548	0.582979	0.675844	0.475685	0.0127269	1.46255	1.04515	0.159179
36	C_0020	Hypotaurine	C00519	HMDB00965	110.027	25.9697	-0.827145	-1.45026	-1.68245	-0.932917	-0.487179	-0.848455	0.605165	1.25735	0.438145	0.596741	1.18981	-0.274258	1.3767	0.777725	0.261023
37	C_0035	Taurine	C00245	HMDB00251	126.022	34.2138	-0.866816	-1.59828	-1.84834	-1.17443	-0.0718102	-0.698751	0.637979	1.185	0.645885	0.627141	0.821682	-0.116022	1.01777	0.827868	0.611135
38	C_0103	Carnosine	C00386	HMDB00033	227.114	7.79711	-1.22155	-1.24791	-1.00186	-0.885779	0.466649	-0.82232	0.950024	1.38719	1.19997	1.19468	1.0542	-0.327648	-0.473663	0.603674	-0.875655
39	C_0016	GABA	C00334	HMDB00112	104.071	9.02151	-0.706892	-1.21312	-1.20286	-0.489549	-0.475181	-0.617359	0.516669	1.61758	1.75556	1.36944	-0.421771	0.0235111	0.428565	0.53271	-1.11731
40	C_0118	Ophthalmic acid	No ID	HMDB05765	290.134	17.1606	-0.5429	-0.967872	-1.29774	-0.727812	-0.813098	-0.109873	0.492378	2.20948	1.00196	1.49535	-0.29761	-0.276103	0.0959042	0.677925	-0.939999
41	C_0001	Trimethylamine	C00565	HMDB00906	60.0812	6.6763	-0.961244	-0.961244	-0.961244	-0.961244	-0.961244	1.07474	0.324945	1.82535	1.27615	0.694975	-0.961244	-0.961244	0.54007	0.348269	0.644208
42	A_0043	Hippuric acid	C01586	HMDB00714	178.05	8.44277	-1.01089	-1.01089	-1.01089	-1.01089	-1.01089	1.64284	1.5376	1.20651	0.798691	1.06373	-0.404831	-0.302859	0.118431	-0.029694	-0.575975
43	C_0111	Thiamine	C00378	HMDB00235	265.112	7.57218	-1.01616	-1.01616	-1.01616	-1.01616	-1.01616	1.02225	1.44234	1.01604	1.2838	1.5739	-0.395714	-0.51843	0.0349545	-0.0219472	-0.35638
44	A_0074	3'-AMP	C01367	HMDB03540	346.054	9.75586	-0.932113	-0.932113	-0.932113	-0.932113	-0.932113	1.46622	1.24068	1.17698	1.22504	1.48005	-0.314114	-0.674107	-0.241266	-0.481041	-0.217879
45	A_0036	Glyceraldehyde 3-phosphate	C00118,C00661	HMDB01112	168.99	11.7172	-0.663039	-0.663039	-0.663039	-0.663039	-0.663039	1.54272	1.66733	0.766186	0.9181	1.73606	-0.663039	-0.663039	-0.663039	-0.663039	-0.663039
46	A_0024	o-Hydroxybenzoic acid	C00805	HMDB01895	137.024	10.4631	-0.666852	-0.666852	-0.666852	-0.666852	-0.666852	1.78907	1.39944	1.29143	0.68738	1.50121	-0.666852	-0.666852	-0.666852	-0.666852	-0.666852
47	A_0035	Dihydroxyacetone phosphate	C00111	HMDB01473	168.99	12.8169	-0.790761	-0.842564	-0.905637	-0.828687	-0.727473	1.27151	0.93816	1.51214	1.4393	1.49855	-0.590755	-0.773619	-0.282036	-0.658467	-0.259648
48	A_0059	Glucose 6-phosphate	C00668,C01172,C00092	HMDB01401	259.021	9.84845	-0.790292	-0.769325	-0.779392	-0.80402	-0.765965	1.27372	1.03979	1.47623	1.54209	1.38796	-0.644448	-0.712511	-0.478843	-0.740617	-0.234378
49	A_0057	Fructose 6-phosphate	C05345,C00085	HMDB00124	259.021	9.96439	-0.772239	-0.743947	-0.73149	-0.765685	-0.74834	1.42081	0.91586	1.71421	1.44004	1.21169	-0.664946	-0.692032	-0.543849	-0.711322	-0.328764
50	A_0055	2-Deoxyglucose 6-phosphate	C06369	No ID	243.026	10.3897	-0.659229	-0.659229	-0.659229	-0.659229	-0.659229	0.970911	1.09955	2.17906	1.101	1.24176	-0.659229	-0.659229	-0.659229	-0.659229	-0.659229
51	A_0058	myo-Inositol 1-phosphate myo-Inositol 3-phosphate	C01177 C04006	HMDB00213 HMDB06814	259.021	10.302	-0.974254	-0.954726	-1.11015	-0.740883	-0.946693	0.816579	0.732096	2.43139	1.23857	0.708313	-0.277291	-0.338731	-0.131997	-0.237901	-0.214319
52	A_0060	Glucose 1-phosphate	C00103	HMDB01586	259.021	10.1498	-1.09484	-1.10972	-0.977381	-1.16905	-1.10064	0.908206	1.2861	1.70611	1.04507	0.914721	-0.3711	-0.471342	0.570977	-0.17487	0.0377491
53	A_0072	Fructose 1,6-diphosphate	C00354	HMDB01058	338.987	14.8446	-0.902909	-0.954217	-0.950052	-0.919194	-0.916707	0.41583	0.943016	1.763	1.07977	1.65912	-0.441013	-0.768333	0.67467	-0.590676	-0.0923004
54	A_0056	myo-Inositol 2-phosphate	No ID	No ID	259.021	10.5635	-0.810503	-0.900542	-0.935893	-0.731968	-0.807127	-0.0272482	1.24856	2.23039	1.4772	0.980295	-0.454658	-0.556528	0.0258828	-0.335049	-0.402806
55	A_0063	Sedoheptulose 7-phosphate	C05382	HMDB01068	289.032	9.61072	-0.991092	-0.991092	-0.991092	-0.991092	-0.991092	0.272202	1.44761	1.95067	1.36819	0.905073	-0.319642	-0.447918	0.169431	-0.282234	-0.107918
56	A_0065	N-Acetylglucosamine 1-phosphate	C04256	HMDB01367	300.047	9.5427	-0.961656	-0.98526	-0.97611	-0.946995	-0.923324	0.421829	1.52961	1.70066	1.45352	1.18003	-0.410829	-0.386688	-0.158359	-0.270689	-0.26574
57	A_0064	N-Acetylglucosamine 6-phosphate	C00357	HMDB01062	300.047	9.15763	-0.904415	-0.904415	-0.904415	-0.904415	-0.833249	0.39288	1.57214	1.60388	1.57672	1.23998	-0.490996	-0.465926	-0.234814	-0.477596	-0.265364
58	A_0045	3-Phosphoglyceric acid	C00197	HMDB00807	184.984	20.3472	-0.961852	-0.935305	-0.988277	-0.965837	-0.720764	0.246057	1.71617	1.45145	1.4881	1.36062	-0.404595	-0.395607	-0.359876	-0.300495	-0.229783
59	C_0032	Betaine aldehyde_+H2O	C00576	HMDB01252	120.102	8.69388	-0.791733	-0.791733	-0.791733	-0.791733	-0.791733	0.664802	1.52478	1.42508	1.3734	1.64518	-0.571688	-0.64526	-0.508033	-0.582005	-0.3676
60	A_0033	Phosphoenolpyruvic acid	C00074	HMDB00263	166.975	22.0399	-0.845364	-0.802552	-0.802741	-0.910427	-0.667299	0.452649	1.25903	2.01627	1.50016	1.17103	-0.443911	-0.557205	-0.640153	-0.540986	-0.188503
61	A_0044	2-Phosphoglyceric acid	C00631	HMDB03391	184.984	19.8152	-0.942593	-0.968827	-1.01948	-0.916128	-0.525285	0.20314	1.60874	1.78368	1.7851	0.589143	-0.117229	-0.294252	-0.540986	-0.513293	-0.131732
62	C_0064	Guanine	C00242	HMDB00132	152.057	9.81671	-1.01528	-1.03561	-1.03633	-1.02391	-0.956478	0.589591	1.00282	1.85463	1.40227	1.33385	-0.249235	-0.422431	-0.0657798	-0.140753	-0.237368
63	C_0051	Hypoxanthine	C00262	HMDB00157	137.045	13.8643	-0.983936	-1.00134	-1.00142	-0.990035	-0.939591	0.460112	1.24112	1.70447	1.32929	1.50307	-0.414568	-0.490926	-0.210038	-0.0751694	-0.131027
64	A_0016	5-Oxoproline	C01879	HMDB00267	128.035	9.49171	-0.988109	-1.12609	-1.08875	-1.09584	-0.905903	0.490411	1.08686	1.46991	1.22901	1.74099	-0.271799	-0.506419	-0.0206613	0.20987	-0.223481
65	C_0109	Uridine	C00299	HMDB00296	245.077	34.384	-1.17602	-1.10576	-1.14537	-1.14585	-0.935421	0.237126	1.12151	1.76607	1.22264	1.38298	-0.101954	-0.147643	0.0625569	0.0752844	-0.110156
66	C_0108	Cytidine	C00475	HMDB00089	244.096	11.7647	-1.26627	-1.09954	-1.09955	-1.24815	-1.02962	0.390479	0.976146	1.78865	1.00024	1.40525	-0.00404995	-0.156346	0.0309578	0.213952	0.0978458
67	C_0023	Uracil	C00106	HMDB00300	113.037	34.3101	-1.11297	-1.11297	-1.11297	-1.11297	-1.11297	0.396876	1.46601	1.3072	0.961607	1.64157	-0.204466	-0.305128	0.154644	0.105092	0.0414369
68	C_0100	N-Acetylglucosylamine	C01239	HMDB01104	221.112	12.103	-0.995996	-0.995996	-0.995996	-0.995996	-0.995996	0.586478	1.34828	1.43161	1.20566	1.69545	0.0309123	-0.522516	-0.353989	-0.179072	-0.262841
69	A_0010	Glyceric acid	C00258	HMDB00139,HMDB06372	105.019	10.4155	-0.93622	-0.93622	-0.93622	-0.93622	-0.93622	0.599773	1.12818	1.48843	1.07874	1.97309	0.046857	-0.539774	-0.265717	-0.362282	-0.466199
70	C_0104	2'-Deoxycytidine	C00881	HMDB00014	228.098	11.4072	-1.34737	-0.0351522	-0.476627	-1.13833	-1.07365	0.073685	1.1257	1.82784	0.940116	1.82257	-0.347626	-0.413532	-0.547166	-0.124642	-0.285812
71	A_0029	Oxypurinol	C07599	HMDB00786	151.025	7.84172	-0.591676	-0.591676	-0.591676	-0.591676	-0.591676	-0.254584	2.23582	1.0558	1.14459	1.73514	-0.591676	-0.591676	-0.591676	-0.591676	-0.591676
72	A_0049	Gluconic acid	C00257	HMDB00625	195.05	8.12388	-0.788487	-0.803693	-0.790662	-0.845256	-0.82612	-0.698717	2.52975	0.227428	0.152964	1.50216	0.0434398	-0.287868	1.06721	0.0336287	-0.515777
73	C_0106	Homocarnosine	C00884	HMDB00745	241.129	7.89782	-1.1309	-0.846983	-0.71258	-0.710045	0.206889	-1.05391	1.54059	1.50032	0.256865	1.86516	0.151614	-0.717642	0.7344	-0.494909	-0.588866
74	A_0061	2,3-Diphosphoglyceric acid	C01159	HMDB01294	264.95	19.2982	0.166927	-1.04448	-1.04448	-1.04448	-1.04448	-0.639621	-0.118003	0.63807	2.2278	0.166761	1.66805	-0.422086	0.487724	-0.541455	0.543765
75	C_0038	N-Methylproline	No ID	No ID	130.086	15.9557	-0.574751	-0.622885	-0.73543	-0.507441	-0.480761	-0.22786	0.100072	0.267437	0.0998811	0.200856	3.37076	-0.409652	0.313615	-0.146766	-0.64707
76	C_0027	5-Aminovaleric acid	C00431	HMDB03355	118.086	9.49956	-0.220455	-1.14529	-1.14529	-0.236771	0.826878	-0.68337	-1.14529	0.238522	-0.12483	0.268028	1.87513	-0.0513567	1.67519	1.01418	-1.14529
77	C_0005	Isopropanolamine	C03194,C05771	No ID	76.0751	8.0734	-0.258199	-0.258199	-0.258199	-0.258199	-0.258199	-0.258199	-0.258199	-0.258199	-0.258199	-0.258199	-0.258199	-0.258199	3.61478	-0.258199	-0.258199
78	C_0040	trans-Glutaconic acid	C02214	HMDB00620	131.033	35.7224	-0.258199	-0.258199	-0.258199	-0.258199	-0.258199	-0.258199	-0.258199	-0.258199	-0.258199	-0.258199	-0.258199	-0.258199	3.61478	-0.258199	-0.258199
79	A_0084	Acetyl CoA_divalent	C00024	HMDB01206	403.556	10.2587	-0.258199	-0.258199	-0.258199	-0.258199	-0.258199	-0.258199	-0.258199	-0.258199	-0.258199	-0.258199	-0.258199	-0.258199	3.61478	-0.258199	-0.258199
80	C_0076	Metronidazole	C07203	No ID	172.071	11.3469	-0.258199	-0.258199	-0.258199	-0.258199	-0.258199	-0.258199	-0.258199	-0.258199	-0.258199	-0.258199	-0.258199	-0.258199	3.61478	-0.258199	-0.258199
81	C_0011	Acetoacetamide	C11106	No ID	102.054	14.6153	-0.258199	-0.258199	-0.258199	-0.258199	-0.258199	-0.258199	-0.258199	-0.258199	-0.258199	-0.258199	-0.258199	-0.258199	3.61478	-0.258199	-0.258199
82	A_0032	Quinolinic acid	C03722	HMDB00232	166.014	16.1071	-0.530052	-0.530052	-0.530052	-0.530052	-0.530052	-0.0855853	-0.351305	-0.339753	-0.396906	-0.304639	0.314993	-0.110054	3.4434	0.327004	0.153106
83	A_0017	Itaconic acid	C00490	HMDB02092	129.02	19.8743	-0.503664	-0.503664	-0.503664	-0.503664	-0.503664	-0.147717	-0.503664	-0.503664	-0.503664	-0.244566	-0.175741	0.0178686	3.26485	1.06619	0.248427
84	C_0007	Putrescine	C00134	HMDB01414	89.1074	5.22076	-0.274371	-1.08758	-1.29547	-0.15257	-0.181352	-0.0860719	-0.386083	-0.214227	-0.900493	-0.345394	-0.218702	0.232872	2.33889	1.99188	0.578663
85	C_0036	1-Methylhistamine	C05127	HMDB00898	126.103	5.47904	-0.358818	-0.667116	-0.938296	0.122874	-0.122118	-0.767071	-0.557315	-0.621439	-0.680239	-0.696454	0.0343112	0.729934	2.41574	1.97372	0.13229
86	A_0014	Succinic acid	C00042	HMDB00254	117.019	21.8668	-0.612762	-0.67039	-0.251623	-0.706189	-0.483138	-0.917773	-0.478713	-0.253149	-0.573285	-0.550175	1.08047	0.93188	1.85809	2.19202	-0.565254
87	A_0018	4-Methyl-2-oxovaleric acid 3-Methyl-2-oxovaleric acid	C00233 C00671,C03465	HMDB00695 HMDB00491	129.055	9.56066	-0.77885	-0.77885	-0.77885	-0.614009	-0.77885	-0.404694	-0.48258	-0.538077	-0.453447	-0.548994	1.37506	1.86709	1.49671	1.54001	-0.121665
88	C_0090	Homocitrulline	C02427	HMDB00679	190.118	13.959	-0.855658	-0.855658	-0.855658	-0.855658	-0.855658	-0.44698	-0.379959	-0.221059	-0.430147	-0.256413	1.15177	0.992241	1.96355	1.87832	0.0269688
89	C_0002	Urea	C00086	HMDB00294	61.0397	32.2206	-0.818811	-0.876472	-0.907118	-0.776862	-0.799551	-0.579847	-0.259601	-0.274472	-0.445413	-0.281438	1.16256	0.915474	1.85667	2.02451	0.060374
90	C_0075	3-Methylhistidine	C01152	HMDB00479	170.092	8.76606	-0.769252	-0.920714	-1.02948	-0.740334	-0.792447	-0.607955	-0.415896	-0.29864	-0.501828	-0.292891	1.24933	1.07207	1.56329	1.98878	0.49596
91	A_0009	2-Hydroxyisobutyric acid	No ID	HMDB00729	103.04	9.91138	-0.712937	-0.897119	-1.15256	-0.833264	-0.810271	-0.657149	-0.13116	-0.192266	-0.512745	-0.179761	1.402	1.08764	1.42681	2.00423	0.158551
92	C_0024	Creatinine	C00791	HMDB00562	114.066	8.49745	-0.673778	-0.993046	-1.11429	-0.685577	-0.649375	-0.797881	-0.245858	-0.183374	-0.487108	-0.156418	1.3552	1.06725	1.74984	1.84277	-0.0283525
93	C_0077	N5-Ethylglutamine	C01047	No ID	175.107	14.267	-0.674666	-0.961048	-1.09318	-0.710663	-0.827752	-0.612104	-0.21289	-0.117266	-0.232221	-0.175308	1.47137	0.746362	1.9611	1.74757	-0.309304
94	C_0083	Glucosamine	C00329	HMDB01514	180.086	11.2014	-0.569587	-0.569587	-0.569587	-0.569587	-0.569587	-0.569587	-0.569587	-0.569587	-0.569587	-0.569587	2.15964	0.257464	1.1793	2.15217	-0.0527068
95	C_0012	Azetidine 2-carboxylic acid	C08267	No ID	102.055	10.5536	-0.628413	-0.628413	-0.628413	-0.628413	-0.628413	-0.628413	-0.628413	-0.628413	-0.628413	-0.628413	1.89665	1.01908	1.66189	1.62695	0.0795637
96	C_0021	Cytosine	C00380	HMDB00630	112.051	8.42705	-0.560368	-0.560368	-0.560368	-0.560368	-0.560368	-0.560368	-0.560368	-0.560368	-0.560368	-0.560368	2.01435	0.700604	1.88155	1.56755	-0.560368
97	A_0015	2-Hydroxyvaleric acid	No ID	HMDB01863	117.055	9.26353	-0.673726	-0.673726	-0.673726	-0.673726	-0.673726	-0.430698	-0.454149	-0.407808	-0.519211	-0.406018	1.05152	0.794235	2.69445	1.29583	-0.249512
98	A_0007	3-Hydroxybutyric acid	C01089,C03197	HMDB00011,HMDB00357,HMDB00442	103.04	9.5552	-0.633341	-0.680998	-0.697608	-0.647391	-0.636326	-0.361462	-0.386821	-0.26725	-0.389087	-0.32062	0.521514	0.490498	3.04388	1.18076	-0.215754
99	A_0008	2-Hydroxybutyric acid	C05984	HMDB00008	103.04	9.77597	-0.813954	-0.813954	-0.813954	-0.813954	-0.813954	-0.126166	-0.201561	-0.176093	-0.395059	-0.088057	0.507797	0.654549	2.83729	1.28379	-0.226717
100	C_0095	O-Acetylcarnitine	C02571	HMDB00201	204.123	10.8512	-0.646025	-1.06179	-1.32359	-0.846239	-0.816399	-0.648692	-0.0968846	0.138609	-0.026547	-0.173235	0.722991	0.37173	2.52472	1.07441	0.806928
101	C_0086	N8-Acetylspermidine	C01029	HMDB02189	188.175	7.24674	-0.84675	-0.84675	-0.84675	-0.84675	-0.84675	-0.205298	-0.222925	-0.412919	-0.487897	-0.238267	0.802287	0.217282	2.60711	1.1422	1.03218
102	C_0015	2-Aminoisobutyric acid	C03665	HMDB01906	104.071	11.7054	-0.797236	-0.880228	-0.934415	-0.810037	-0.789001	-0.452193	-0.153394	-0.268441	-0.431815	-0.0200354	0.322982	0.471488	2.60313	1.5987	0.540502
103	C_0073	Tyr-Arg_divalent	No ID	No ID	169.595	9.04795	-0.837582	-0.837582	-0.837582	-0.837582	-0.837582	-0.180311	-0.522045	-0.540634	-0.360078	-0.246531	0.674795	0.495987	2.11661	1.98397	0.766145
104	C_0080	Guanidinosuccinic acid	C03139	HMDB03157	176.066	12.3708	-0.623576	-0.623576	-0.623576	-0.623576	-0.623576	-0.623576	-0.623576	-0.623576	-0.623576	-0.623576	0.9375	0.853674	2.04706	2.04709	0.350435
105	A_0092	CDP-choline	C00307	HMDB01413	487.099	6.71256	-0.609784	-0.609784	-0.609784	-0.609784	-0.609784	-0.609784	-0.609784	-0.609784	-0.609784	-0.609784	0.684007	0.416379	2.40182	1.79931	0.796313
106	A_0079	CoA_divalent	C00010	HMDB01423	382.55	10.6491	-0.88912	-0.88912	-0.88912	0.0439284	-0.203978	-0.88912	-0.243156	-0.88912	-0.88912	-0.30586	0.653176	0.467728	2.00118	1.19413	1.72756
107	A_0096	ADP-ribose	C00301	HMDB01178	558.064	8.49053	-0.213933	-0.575935	-0.613679	-0.625992	-0.161139	-0.781787	-0.781787	-0.781787	-0.781787	-0.781787	0.53327	0.667454	2.46472	1.16796	1.26621
108	C_0048	Thiaproline	No ID	No ID	134.027	18.4135	-0.726307	-0.735819	-0.760755	-0.716557	-0.72915	-0.526584	-0.5192	-0.599533	-0.622913	-0.585992	1.26756	0.831129	2.22404	1.04777	1.15232
109	A_0098	UDP-glucuronic acid	C00167	HMDB00935	579.026	11.0652	-0.504128	-0.653381	-0.769254	-0.345162	-0.43064	-0.769254	-0.660956	-0.660456	-0.651994	-0.659907	1.23893	0.458567	2.51573	1.28758	0.60432
110	A_0101	UDP-N-acetylglucosamine	C00043	HMDB00290	606.074	8.40373	-0.298621	-0.555836	-0.719968	-0.153655	-0.241507	-0.881567	-0.842016	-0.860181	-0.845061	-0.883353	1.2564	0.811604	2.22205	1.24373	0.747986
111	A_0097	UDP-glucose UDP-galactose	C00029 C00052	HMDB00286 HMDB00302	565.046	8.59284	-0.261809	-0.631205	-0.784872	-0.221984	-0.288628	-0.918256	-0.757114	-0.773335	-0.733129	-0.858946	1.3007	0.886792	2.36525	0.929642	0.746895
112	A_0099	ADP-glucose GDP-fucose	C00498 C00325	HMDB06557 HMDB01095	588.075	8.26632	-0.394864	-0.742887	-0.952016	-0.504387	-0.260864	-1.06833	-0.598895	-0.284598	-0.200643	-0.722045	1.34914	0.633218	2.66294	0.440581	0.643647
113	C_0110	Glycerophosphocholine	C00670	HMDB00086	258.11	33.3656	-0.626742	-0.631242	-0.624478	-0.630417	-0.614538	-0.579834	-0.382321	-0.558289	-0.50847	-0.492499	1.38534	0.123574	2.81668	0.711184	0.612049
114	C_0126	Cysteine glutathione disulfide	C05526	HMDB00656	427.095	14.6851	-0.532187	-0.523054	-0.530305	-0.5282	-0.512156	-0.423255	-0.452745	-0.514809	-0.49763	-0.474882	1.25898	0.0288221	3.12107	0.329228	0.251129
115	C_0105	Cystine	C00491,C01420	HMDB00192	241.031	13.6843	-0.472588	-0.472588	-0.472588	-0.472588	-0.472588	-0.472588	-0.472588	-0.472588	-0.472588	-0.472588	1.71555	-0.225178	2.95296	0.0610278	0.221512
116	A_0078	NADPH_divalent	C00005	HMDB00221	371.539	11.3488	-0.479512	-0.479512	-0.479512	-0.479512	-0.479512	-0.479512	-0.479512	-0.479512	-0.479512	-0.479512	1.47951	0.113242	2.95693	0.724952	-0.479512
117	A_0105	NADP+	C00006	HMDB00217	742.07	9.37723	-0.210463	-0.694537	-0.755208	-0.21639	0.0707851	-0.923691	-0.706174	-0.644962	-0.41274	-0.69714	2.08566	0.409253	2.35767	0.552224	-0.214283
118	A_0104	NADH	C00004	HMDB01487	664.119	8.15397	-0.392697	-0.761023	-0.71569	-0.194564	-0.152575	-1.08671	-0.623489	-0.452719	-0.6509	-0.730055	1.85145	1.08613	2.10665	0.93255	-0.21636
119	C_0112	Adenosine	C00212	HMDB00050	268.103	12.0313	-0.334128	0.0790592	-0.165736	-0.246314	0.539628	-0.948892	-0.937237	-0.931087	-0.938712	-0.933345	1.77051	0.739654	2.2038	0.580994	-0.478188
120	A_0069	CMP	C00055	HMDB00095	322.043	9.57497	0.231146	-0.324858	-0.607192	0.279128	0.355269	-1.03441	-1.03441	-1.03441	-1.03441	-1.03441	0.850866	0.876373	2.23083	1.20138	0.0791273
121	A_0070	UMP	C00105	HMDB00288	323.027	9.74849	0.30528	-0.303322	-0.647361	0.249498	-0.141418	-0.959563	-0.959563	-0.959563	-0.959563	-0.959563	1.05697	0.610219	2.25639	1.4583	-0.0467436
122	A_0077	GMP	C00144	HMDB01397	362.049	9.10497	0.391012	-0.190514	-0.57938	0.502866	0.036988	-0.94242	-0.94242	-0.94242	-0.94242	-0.94242	1.13747	0.317841	2.69111	0.377415	0.0272912
123	A_0100	GDP-mannose GDP-galactose	C00096 C02280	HMDB01163 No ID	604.069	8.24965	0.268637	-0.286223	-0.978515	0.330281	0.172439	-0.978515	-0.978515	-0.978515	-0.978515	-0.978515	1.09814	0.670259	2.34309	0.686071	0.588397
124	A_0094	ATP	C00002	HMDB00538	505.988	11.8408	-0.173945	-0.829618	-0.906549	0.323869	0.249769	-1.19708	-0.58364	-0.310353	-0.778494	-1.05916	1.26174	0.522491	2.52424	0.485256	0.471486
125	A_0095	GTP	C00044	HMDB01273	521.983	11.5054	0.075282	-0.781128	-1.3143	0.450674	-0.0467888	-0.956628	-0.455047	-0.450596	-0.620725	-0.724	1.13366	-0.0968222	2.68353	0.314038	0.78885
126	A_0087	GDP	C00035	HMDB01201	442.016	10.648	1.12378	-1.15823	-1.37829	0.852734	-0.67733	-0.971996	-0.483372	0.155634	-0.186573	-0.574642	0.582479	-0.276931	2.47974	0.407652	0.105345
127	C_0097	Carboxymethyllysine	No ID	No ID	205.118	11.0936	0.554217	-1.26822	-1.50033	-0.117102	0.129691	-1.14928	-0.161268	-0.205743	-0.384327	-0.38264	1.22476	-0.109605	2.36204	1.01407	-0.00625226
128	A_0022	Threonic acid	C01620	HMDB00943	135.03	9.25307	0.619955	-1.2583	-1.06522	-1.39602	-0.963018	-0.83297	-0.540697	0.106004	0.107384	0.376684	1.712	0.0107623	1.6933	0.872475	0.557658
129	C_0121	Glutathione (GSSG)_divalent	C00127	HMDB03337	307.083	15.5057	-0.290693	-1.06331	-1.28408	-0.928289	-0.724023	-0.781121	-0.00386597	0.358318	0.252151	-0.213514	1.45142	0.479557	2.42036	0.735436	-0.408346
130	A_0102	CMP-N-acetylneuraminate	C00128	HMDB01176	613.144	8.19314	-0.368398	-1.32908	-1.69929	-0.72919	-0.402177	-0.699166	0.265855	0.446297	0.674566	-0.362118	1.5857	0.394299	2.05787	0.438508	-0.273678
131	C_0009	β-Ala	C00099	HMDB00056	90.0551	8.54935	-0.887706	-1.2386	-1.35146	-0.926111	-0.511897	-0.867189	0.184508	0.612061	0.0132113	0.223289	1.16466	0.200864	2.10872	1.29503	-0.0193812
132	C_0056	Stachydrine	C10172	HMDB04827	144.102	14.488	-1.06394	-1.16263	-1.21466	-1.06945	-1.06217	-0.663462	0.441642	0.579754	0.195696	0.501148	1.64408	0.264842	1.68824	0.9405	-0.0195754
133	C_0085	Phosphorylcholine	C00588	HMDB01565	184.073	30.9466	-0.869715	-1.33624	-1.66992	-0.911317	-0.987897	-0.620844	0.460681	0.760941	0.276959	0.463788	1.36081	0.0349768	1.39852	1.16748	0.471765
134	C_0091	Gly-Asp	No ID	No ID	191.065	12.049	-1.05772	-1.29976	-1.76723	-1.07398	-0.844476	-0.255238	0.304585	0.6397	0.45667	0.45196	0.926497	0.162285	1.39171	1.46728	0.497725
135	C_0057	γ-Butyrobetaine	C01181	HMDB01161	146.117	9.55624	-0.814866	-1.44484	-1.70176	-1.06185	-0.634714	-0.505014	0.366424	0.799196	0.143424	0.0894054	0.921809	0.602174	1.55397	1.44162	0.245022
136	C_0081	Citrulline	C00327	HMDB00904	176.103	13.7845	-1.04613	-1.25649	-1.38761	-1.06763	-1.11492	-0.531435	0.549512	0.893185	0.350667	0.669726	0.739151	0.462388	1.39365	1.52639	-0.180459
137	A_0028	2-Hydroxyglutaric acid	C02630,C01087,C03196	HMDB00606,HMDB00694	147.03	17.1995	-1.053	-1.27898	-1.27898	-0.968402	-0.932348	-0.593986	0.468286	0.574485	0.0159531	0.316953	0.644807	0.127675	2.05543	1.36567	0.53644
138	A_0042	Ascorbic acid	C00072	HMDB00044	175.024	8.48859	-1.08928	-1.08928	-1.08928	-1.05591	-1.08928	-0.816283	0.520307	0.187532	-0.0620988	0.643553	0.845834	-0.00918107	1.89127	1.17553	1.03655
139	A_0066	N-Acetylneuraminic acid	C00270	HMDB00230	308.097	7.13488	-1.08805	-1.08805	-1.08805	-1.08805	-1.08805	-0.158634	0.531014	-0.261197	0.530242	0.190874	0.763084	0.254988	2.43711	0.837686	0.315063
140	C_0066	Ala-Ala	C00993	HMDB03459	161.091	11.1618	-1.13774	-1.13774	-1.13774	-1.13774	-1.13774	0.567207	0.41238	-0.238596	-0.153247	0.20033	0.250775	0.326492	1.94991	1.4388	0.934671
141	C_0120	Arg-Glu	No ID	No ID	304.16	8.7631	-1.10772	-1.10772	-1.10772	-1.10772	-1.10772	0.415192	-0.293107	-0.211182	-0.100812	0.264771	0.787861	0.328617	1.98867	1.27056	1.08802
142	C_0060	Lys	C00047,C00739,C16440	HMDB00182,HMDB03405	147.112	7.9484	-0.976819	-1.12442	-1.26765	-1.00119	-1.01312	0.285609	-0.0542964	-0.142354	-0.287879	0.0827473	1.02737	0.21896	2.00403	1.51354	0.735472
143	C_0101	N-Acetylglucosamine	C00140	HMDB00215	222.098	34.2893	-1.00838	-1.00838	-1.00838	-1.00838	-1.00838	-0.131407	-0.195238	-0.3134	-0.312095	-0.0742936	1.18315	0.500338	2.0322	1.41278	0.939859
144	C_0030	Homoserine	C00263	HMDB00719	120.064	12.339	-1.10257	-1.10257	-1.10257	-1.10257	-1.10257	-0.176802	0.0879546	0.0317211	-0.20888	0.127193	0.925054	0.614495	2.15659	1.09106	0.864452
145	A_0048	Glucuronic acid	C00191	HMDB00127	193.034	8.07642	-1.19291	-1.19291	-1.19291	-1.19291	-1.19291	-0.135985	0.263118	-0.000480829	-0.0729505	0.532815	1.35702	0.393289	1.4246	0.935142	1.26797
146	C_0045	Gly-Gly	C02037	HMDB11733	133.06	9.91855	-1.26395	-1.26395	-1.26395	-1.26395	-1.26395	0.861573	0.359934	0.143862	0.305584	0.665737	0.945427	-0.144988	1.48031	0.969079	0.733254
147	C_0043	Leu	C00123,C01570,C16439	HMDB00687	132.101	12.6976	-1.20434	-1.24018	-1.2756	-1.1839	-1.20088	0.654921	0.2078	0.175114	0.0923917	0.547231	0.873112	0.070005	1.79673	1.23777	0.449818
148	C_0072	Phe	C00079,C02057,C02265	HMDB00159	166.086	13.8389	-1.18305	-1.22365	-1.25519	-1.15114	-1.17733	0.513694	0.142622	0.0900141	0.0872781	0.394368	0.726051	0.168025	1.7215	1.59183	0.554976
149	C_0084	Tyr	C00082,C01536,C06420	HMDB00158	182.081	14.2501	-1.18945	-1.23998	-1.28707	-1.16178	-1.17558	0.384662	0.20487	0.226972	0.297838	0.564143	0.563281	0.0519267	1.93116	1.29462	0.534385
150	C_0031	Thr	C00188,C00820	HMDB00167	120.065	12.9801	-1.20612	-1.28512	-1.33182	-1.19974	-1.18131	0.240315	0.304913	0.383409	0.252179	0.4467	0.787845	0.264735	1.58668	1.53406	0.403262
151	C_0028	Val	C00183,C06417,C16436	HMDB00883	118.086	12.2552	-1.14312	-1.21239	-1.28503	-1.08905	-1.11952	0.245758	0.099969	0.185461	-0.00813006	0.363969	1.10592	0.25671	1.915	1.35239	0.332077
152	C_0065	His	C00135,C00768,C06419	HMDB00177	156.076	8.49682	-1.11521	-1.21258	-1.31379	-1.06189	-1.10868	-0.015765	0.0653352	0.110395	-0.0580257	0.369511	1.15869	0.286218	1.66838	1.53672	0.690689
153	C_0096	Trp	C00078,C00525,C00806	HMDB00929	205.097	13.7185	-1.18685	-1.26603	-1.32523	-1.14966	-1.1865	0.0169785	0.122459	0.268048	0.116807	0.41055	1.05388	0.614403	1.41318	1.57218	0.525793
154	C_0070	5-Hydroxylysine	C16741	HMDB00450	163.107	8.29699	-1.22769	-1.22769	-1.22769	-1.22769	-1.22769	-0.0559513	0.151296	0.530805	0.0488194	0.260322	1.13744	0.362332	1.37479	1.33716	0.991413
155	C_0116	1-Methyladenosine	C02494	HMDB03331	282.118	12.1494	-1.18332	-1.18332	-1.18332	-1.18332	-1.18332	-0.287305	0.0692057	0.458233	0.0490323	0.521618	1.23662	0.261416	1.73764	1.11017	0.759966
156	A_0054	Ribulose 5-phosphate	C00199,C01101	HMDB00618	229.011	11.0283	-1.19303	-1.27227	-1.31146	-1.2319	-1.04176	-0.205575	0.0757392	0.825796	0.350718	0.120511	0.824047	0.393069	1.70948	1.1993	0.757341
157	C_0049	Asp	C00049,C00402,C16433	HMDB00191,HMDB06483	134.044	14.539	-1.21815	-1.36615	-1.31911	-1.17048	-1.10946	-0.267586	0.701477	0.847805	0.338	0.630268	0.742919	-0.00619434	1.61626	1.01572	0.564685
158	C_0046	Asn	C00152,C01905,C16438	HMDB00168	133.06	12.9287	-1.13639	-1.32061	-1.39758	-1.17111	-1.10297	0.354987	0.45009	0.466525	0.306087	0.633819	0.68646	-0.168858	1.89123	1.04373	0.464583
159	C_0044	Ile	C00407,C06418,C16434	HMDB00172	132.102	12.5391	-1.23735	-1.28657	-1.33712	-1.1813	-1.20675	0.424417	0.291482	0.483999	0.508876	0.789828	0.569567	0.0697711	1.81083	1.06134	0.238991
160	C_0018	Ser	C00065,C00716,C00740	HMDB00187,HMDB03406	106.05	12.1973	-1.17091	-1.36302	-1.44897	-1.20156	-1.1103	0.397688	0.52507	0.529307	0.481467	0.696452	0.324598	-0.000625156	1.5941	1.31623	0.430457
161	C_0010	Ala	C00041,C00133,C01401	HMDB00161,HMDB01310	90.0551	10.837	-1.06838	-1.40398	-1.59415	-1.08806	-0.94529	0.333198	0.492279	0.724322	0.348213	0.726631	0.403694	-0.0372366	1.80582	1.13482	0.168112
162	C_0098	Kynurenine	C00328,C01718	HMDB00684	209.092	12.0701	-1.10779	-1.29916	-1.34801	-1.06943	-1.11005	0.128462	0.563849	0.625396	0.224053	0.604789	0.371459	0.324941	2.22565	0.731698	0.13414
163	C_0058	Spermidine	C00315	HMDB01257	146.165	5.01004	-0.832974	-1.254	-1.48922	-0.54944	-1.01055	-0.102654	0.547821	0.724641	-0.401357	0.830234	-0.0432758	-0.34744	2.21665	0.909417	0.802161
164	A_0053	Ribose 5-phosphate	C00117	HMDB01548	229.011	10.5902	-1.22698	-1.25024	-1.26849	-1.22076	-1.07074	0.130367	0.370631	0.973629	0.465488	0.377492	0.0329832	-0.188214	1.63408	1.06185	1.17891
165	C_0115	Glu-Glu	C01425	No ID	277.102	13.5021	-1.10662	-1.10662	-1.10662	-1.10662	-1.10662	0.0604583	0.0189684	0.300423	-0.0417115	0.0940407	0.267839	0.418028	1.17325	2.28966	0.952132
166	C_0099	β-Ala-Lys	C05341	No ID	218.149	7.79331	-1.02826	-1.02826	-1.02826	-1.02826	-1.02826	0.298584	0.414836	-0.360881	-0.293798	-0.271595	0.240752	0.636482	1.34212	2.26885	0.865931
167	C_0087	N6-Acetyllysine	C02727	HMDB00206	189.123	14.3674	-0.720612	-1.11143	-1.55396	-1.00624	-0.910075	0.65295	0.00192819	-0.16017	-0.254021	-0.150572	0.961498	0.445072	1.55509	1.95514	0.295398
168	C_0093	SDMA	No ID	HMDB03334	203.15	9.1607	-0.4201	-1.18546	-1.44852	-1.02708	-0.70828	0.545623	-0.0614317	-0.252744	-0.564886	-0.0346607	0.945576	0.0967122	2.06824	1.65659	0.390422
169	C_0089	N6,N6,N6-Trimethyllysine	C03793	HMDB01325	189.159	8.34303	-0.322271	-1.35478	-1.58649	-1.09154	-1.07789	-0.371558	-0.066643	0.153948	0.133446	0.252819	0.881411	0.471565	1.42903	1.84568	0.703274
170	C_0013	Homoserinelactone	No ID	No ID	102.055	8.24861	-0.148482	-1.74424	-1.74424	-0.536274	-0.817493	-0.719451	0.267654	0.0496049	0.559421	-0.0423153	0.924179	0.515375	1.46374	1.62784	0.344675
171	C_0125	S-Adenosylmethionine	C00019	HMDB01185	399.144	8.24898	-0.612387	-1.13472	-1.73087	-0.62134	-0.316629	-0.934379	-0.312208	0.234531	-0.334661	0.0529928	1.30972	0.540154	1.51611	1.74746	0.596216
172	A_0005	Lactic acid	C00186,C00256,C01432	HMDB00190,HMDB01311	89.0243	10.8778	-0.670347	-1.04708	-1.23927	-0.395715	-0.649285	-0.703591	-0.434585	0.284117	-0.43665	-0.0129093	0.43223	0.447072	1.94671	2.27285	0.206447
173	C_0067	N6-Methyllysine	C02728	HMDB02038	161.128	8.23026	-0.847783	-1.09946	-1.44741	-0.903605	-0.80871	0.0739227	-0.0254974	0.0234536	-0.0760712	0.128776	0.529351	0.922261	2.03093	1.77406	-0.27422
174	C_0124	S-Adenosylhomocysteine	C00021	HMDB00939	385.129	10.4229	-1.11315	-1.11315	-1.11315	-1.11315	-1.11315	-0.15013	-0.0490843	0.14458	0.0391635	0.451457	0.750038	0.806235	1.77772	1.78333	0.012452
175	C_0004	Gly	C00037	HMDB00123	76.0393	9.83313	-0.751839	-1.30666	-1.54162	-0.947957	-0.699724	-0.457253	0.184688	0.549873	-0.172842	0.395807	0.271203	0.565347	1.67373	1.99421	0.243045
176	C_0041	Hydroxyproline	C01015,C01157	HMDB06055,HMDB00725	132.065	15.2909	-1.02779	-1.31502	-1.44679	-1.01108	-0.91131	-0.524368	0.338158	0.499289	0.156933	0.46264	0.559129	0.722138	1.2013	2.00755	0.289222
177	C_0008	Sarcosine	C00213	HMDB00271	90.055	11.4637	-0.912026	-1.27978	-1.46091	-1.055	-0.82468	-0.312543	0.380841	0.806201	0.0955625	0.796369	-0.171766	0.854866	0.91138	2.11492	0.0565587
178	C_0026	Guanidoacetic acid	C00581	HMDB00128	118.061	9.72227	-1.15068	-1.15068	-1.15068	-1.15068	-1.15068	-0.0954731	0.722135	0.331529	-0.220705	0.223367	1.21638	1.10239	0.365577	1.94567	0.162535
179	C_0055	1-Methyl-4-imidazoleacetic acid	C05828	HMDB02820	141.066	9.74646	-0.71362	-1.07452	-1.1421	-0.854759	-0.754414	-1.13572	0.504217	0.623191	0.246352	0.222501	2.23888	0.61943	0.732804	1.14862	-0.660864
180	C_0039	Pipecolic acid	C00408	HMDB00070,HMDB00716,HMDB05960	130.086	12.6286	-0.788783	-1.01808	-1.17901	-0.872773	-0.757553	-0.00165092	0.599313	0.821269	0.378374	0.712039	0.332385	-0.245213	2.63881	0.240997	-0.860123
181	C_0006	Trimethylamine N-oxide	C01104	HMDB00925	76.0756	7.59319	-0.399426	-1.17595	-1.68682	-0.663122	-0.466821	1.34	0.384164	0.807955	-0.00066611	0.135736	0.477394	-0.606902	2.28695	0.242151	-0.674656
182	A_0006	Valeric acid	C00803	HMDB00892	101.061	9.26871	0.0141334	-1.6236	-1.72681	-0.975497	0.0956763	-0.114799	0.0259562	1.31306	0.675597	0.469114	0.899474	0.426167	1.66126	-0.0191237	-1.12061
183	C_0042	Creatine	C00300	HMDB00064	132.077	10.562	0.205274	-1.1752	-2.29002	-0.210349	0.618069	-1.10081	0.464884	1.3803	0.0431094	0.532096	-0.159924	-0.157058	1.52753	0.814017	-0.49192
184	C_0102	Cystathionine	C00542,C02291	HMDB00099	223.074	12.0895	-0.200157	-1.3328	-1.86214	-0.522598	0.489846	-1.17366	0.43228	0.481486	-0.387515	0.0028388	-0.428705	0.599024	1.37846	1.82282	0.70082
185	A_0041	N-Acetylaspartic acid	C01042	HMDB00812	174.04	14.8689	-0.60903	-1.0089	-1.09525	-0.736541	-0.33532	-0.522383	1.52175	0.38299	0.131558	0.233221	-0.509066	0.520408	-0.0208847	2.65518	-0.607727
186	A_0031	3-Hydroxy-3-methylglutaric acid	C03761	No ID	161.045	15.843	-0.258199	-0.258199	-0.258199	-0.258199	-0.258199	-0.258199	-0.258199	-0.258199	-0.258199	-0.258199	-0.258199	-0.258199	-0.258199	3.61478	-0.258199
187	A_0002	Propionic acid	C00163	HMDB00237	73.0296	11.0335	-0.258199	-0.258199	-0.258199	-0.258199	-0.258199	-0.258199	-0.258199	-0.258199	-0.258199	-0.258199	-0.258199	-0.258199	-0.258199	3.61478	-0.258199
188	C_0033	Cys	C00097,C00736,C00793	HMDB00574,HMDB03417	122.027	14.1573	-0.507507	-0.507507	-0.507507	-0.507507	-0.507507	-0.477118	-0.451804	-0.507507	-0.507507	-0.483465	0.0181664	0.394711	-0.132077	1.90195	2.78218
189	A_0047	Citric acid	C00158	HMDB00094	191.019	27.8583	0.036887	0.0589349	-1.13533	0.195215	0.249218	-0.853059	-0.349996	-1.06541	-1.02059	-1.38288	1.09433	1.79894	0.262059	1.73946	0.372222
190	C_0082	Serotonin	C00780	HMDB00259	177.101	10.4715	1.75108	1.24222	-0.766153	-0.766153	-0.766153	-0.766153	-0.766153	-0.766153	-0.766153	-0.766153	0.343668	0.210924	1.97747	0.770651	-0.166783
191	C_0022	Histamine	C00388	HMDB00870	112.087	5.29989	2.8187	0.335662	-0.433798	-0.572919	0.141308	-0.710746	-0.710746	-0.710746	-0.710746	-0.710746	-0.455477	0.385956	0.415553	1.44144	-0.522696
192	A_0076	IMP	C00130	HMDB00175	347.038	9.45102	1.54504	0.200001	-0.712934	0.858171	1.29517	-1.06645	-1.06645	-1.06645	-1.06645	-1.06645	0.591433	-0.124115	1.37035	0.734755	-0.425642
193	A_0103	NAD+	C00003	HMDB00902	662.102	6.50487	1.76947	0.305606	-0.335664	1.52547	1.57581	-1.11922	-0.9585	-0.916149	-0.898206	-0.960504	0.431552	0.128978	0.19797	0.170693	-0.917299
194	A_0075	AMP	C00020	HMDB00045	346.055	9.26563	2.58555	0.341924	-0.307641	1.0947	0.144625	-0.941117	-0.938811	-0.936521	-0.933641	-0.938749	0.431923	-0.161928	0.995863	0.088006	-0.524177
195	A_0091	UTP	C00075	HMDB00285	482.96	12.6673	1.66547	-0.298259	-0.901185	2.20658	0.380339	-0.901185	-0.901185	-0.901185	-0.901185	-0.901185	0.26062	-0.0834832	1.0728	0.148349	0.0546978
196	A_0004	Pyruvic acid	C00022	HMDB00243	87.0091	13.1075	1.48732	-0.7889	-1.33367	2.45615	0.449613	-0.561492	-0.18359	0.170927	-1.33367	-0.129146	0.167294	-0.745553	0.304131	0.408441	-0.367851
197	A_0051	Phosphocreatine	C02305	HMDB01511	210.028	12.3935	1.84609	-0.341492	0.0942035	2.26853	0.126931	-0.252693	0.198931	0.659912	0.149536	-0.0572581	-1.1093	-0.422973	-1.07219	-1.05356	-1.03466
198	A_0052	Pantothenic acid	C00864	HMDB00210	218.102	7.63117	2.01627	-0.159379	-0.861895	1.42835	1.61202	-0.418839	-0.484817	0.580047	0.273864	0.0755701	-0.630743	-0.858568	-0.496811	-0.750142	-1.32493
199	A_0086	ADP	C00008	HMDB01341	426.021	10.9285	1.91331	0.228737	-0.122169	1.7307	1.5843	-1.04393	-1.07243	0.207851	-0.0547895	-0.729668	-0.355238	-0.684843	0.0418949	-0.809294	-0.834427
200	A_0083	UDP	C00015	HMDB00295	402.993	11.6783	2.56525	0.0616648	-0.316082	2.17454	0.305863	-0.65804	-0.616133	-0.497514	-0.37311	-0.603097	-0.468068	-0.496528	-0.143672	-0.4082	-0.526879
201	A_0082	CDP	C00112	HMDB01546	402.009	11.5242	2.3226	0.185169	-0.61492	2.13781	0.63227	-0.61492	-0.61492	-0.61492	-0.61492	-0.61492	-0.61492	-0.61492	0.415634	-0.159209	-0.61492
202	A_0027	2-Oxoglutaric acid	C00026	HMDB00208	145.014	22.354	1.73001	0.372148	-0.70103	2.17134	1.16009	-0.70103	-0.70103	-0.70103	-0.70103	-0.70103	-0.70103	0.409219	-0.70103	0.466453	-0.70103
203	C_0122	Glutathione (GSH)	C00051	HMDB00125	308.091	17.1925	1.31807	-0.228616	-1.27211	1.73668	1.14592	-1.09351	-0.132017	-0.412246	-0.438477	-0.443728	-0.995154	-0.229648	-1.0365	0.718732	1.3626
204	C_0074	Noradrenaline	C00547	HMDB00216	170.082	10.8842	-0.258199	-0.258199	-0.258199	-0.258199	3.61478	-0.258199	-0.258199	-0.258199	-0.258199	-0.258199	-0.258199	-0.258199	-0.258199	-0.258199	-0.258199
205	A_0039	N-Acetylleucine	C02710	HMDB11756	172.097	8.03524	1.30377	-0.377668	2.30272	-0.638092	1.2632	0.63033	-0.542764	-0.0664408	-0.159899	0.0455119	-0.320154	-0.768354	-0.0951627	-1.51855	-1.05844
206	A_0023	m-Toluic acid	C07211	No ID	135.045	9.15709	0.533436	-0.510835	2.57344	-0.32218	0.858458	-0.413643	-0.113204	1.22893	0.225162	-0.245419	-1.23237	-0.930217	0.109843	-1.22614	-0.535259
207	C_0054	Urocanic acid	C00785	HMDB00301	139.05	9.78777	-0.830555	0.213235	2.67705	-0.830555	-0.830555	-0.830555	0.327647	-0.830555	0.544557	0.28107	-0.830555	0.392439	0.257088	1.1208	-0.830555
208	C_0113	2'-Deoxyguanosine	C00330	HMDB00085	268.105	14.4723	-0.377866	2.25781	2.65445	-0.377866	-0.377866	-0.377866	-0.377866	-0.377866	-0.377866	-0.377866	-0.377866	-0.377866	-0.377866	-0.377866	-0.377866
209	A_0034	Uric acid	C00366	HMDB00289	167.02	8.88382	-0.489237	2.57	2.31101	-0.530709	-0.36527	-0.449573	-0.253219	-0.325616	-0.421972	-0.433474	-0.43963	-0.45668	0.00314765	-0.386866	-0.331913
210	C_0063	Triethanolamine	C06771	No ID	150.112	9.75281	0.233354	2.41579	0.123884	0.812334	-0.792955	-0.12937	-0.00921596	-0.412492	1.71748	-0.674285	-0.822199	-0.629501	0.0417819	-0.499659	-1.37494
211	C_0019	Diethanolamine	C06772	HMDB04437	106.086	8.96835	0.0196163	2.27213	0.233269	0.376657	-1.38814	0.682275	-0.369566	0.30573	1.3288	-1.38814	0.152176	-0.370824	0.0215348	-0.487375	-1.38814
	C and A indicates cationic and anionic modes. N.D.(not detected), N.A.(not aveilable)
†	Metabolites identified from HMT database based on m/z and migration time
§	Data use eps (2-52) in place of N.D.
