# Supplementary material for: Altered glucose metabolism and hypoxic response in alloxan-induced diabetic atherosclerosis in rabbits
Source: PLoS One. 2017 Apr 14;12(4):e0175976. doi: 10.1371/journal.pone.0175976 (PMC5391952; doi:10.1371/journal.pone.0175976)
Supplement: S4 Table — (XLSX) [file pone.0175976.s004.xlsx]

## Sheet: Fig.2 original data
Figure 2, Original data
glucose 6-phosphate (nmol/g)
control arteries		atherosclerotic arteries
non-diabetic	diabetic	non-diabetic	diabetic
14	8.2	169	16
11	12	150	10
8	6.6	185	29
7.2	4.2	190	8.2
		178	49
fructose 6-phosphate (nmol/g)
control arteries		atherosclerotic arteries
non-diabetic	diabetic	non-diabetic	diabetic
2.6	1.9	45	3
2.3	2.6	35	2.5
1.6	1.5	51	5.5
1.4	1.3	45	2.1
		41	9.8
glyceraldehyde 3-phosphate (nmol/g)
control arteries		atherosclerotic arteries
non-diabetic	diabetic	non-diabetic	diabetic
2.1	1.4	13	0
2	1.4	14	0
1.8	1.2	8.7	0
1.8	0	9.6	0
		15	0
dihydroxyacetone phosphate (nmol/g)
control arteries		atherosclerotic arteries
non-diabetic	diabetic	non-diabetic	diabetic
13	9.5	101	19
13	10	86	11
13	8.2	112	33
11	4.2	109	16
		111	34
phosphoenolpyruvic acid (nmol/g)
control arteries		atherosclerotic arteries
non-diabetic	diabetic	non-diabetic	diabetic
2.4	1.9	48	17
1.7	4	76	13
2.6	2.1	102	11
2.1	2.8	85	14
		73	26

## Sheet: Fig.3B original data
Figure 3B, Original data
FDG (%Idxkg/m^2)
control arteries		atherosclerotic arteries
non-diabetic	diabetic	non-diabetic	diabetic
1.58521	2.16176	16.6976	5.90393
1.91888	1.91178	12.1839	6.45235
1.98245	1.77987	12.1257	5.69461
1.60594	1.84721	7.00145	5.77417
1.92382	1.77686	13.8999	9.34878
1.68098	1.37223	7.50947	6.46569
1.73481	1.28438	13.2992	9.08228
1.33568	1.14492	11.4333	9.53221
1.92897	1.63952	7.34023	8.03997
1.91949	3.0472	6.05415	6.18513
1.57512	1.4844	7.94767	3.87753
1.49308	1.26257	8.13847	4.14279
1.83039	1.74996	3.33121	6.06928
1.92899	1.68079	2.63279	4.17229
1.52615	1.81512	4.66512	6.64004
1.39581	2.52367	4.81501	6.71803
2.00637	1.41894	5.8578	6.34204
2.50151	1.74242	3.38151	6.52872
2.30619	1.83876	2.34114	5.26744
1.37682	1.99107	4.44845	6.85061
1.8329	1.97132	3.25364	4.51576
2.09044	1.89364	7.70158	4.32006
2.21898	2.34586	9.69792	2.02972
2.58755	1.49663	9.55092	3.8051
1.78259	1.40995	7.17558	3.60323
2.12814	1.99268	8.81024	4.66809
2.18873	2.03997	4.89027	4.36068
2.55875	1.17572	5.27435	4.02775
3.20026	2.20183	8.24976	6.17274
2.7854	1.46957	13.9015	4.97073
1.23907	1.26488	7.58363	6.66424
0.929	1.47573	1.142	7.28754
0.771	1.6131	2.658	6.95678
1.11	1.63896	3.441	6.57928
0.802	1.74986	3.298	1.397
1.015	1.43912	3.517	1.942
0.828	0.758	2.35	1.268
0.895	0.9	2.799	2.032
1.054	0.933	1.82	1.772
0.888	0.768	2.575	1.719
1.16	0.702	3.458	5.14
1.069	0.892	5.658	4.012
3.183	0.582	2.658	2.902
3.105	0.54	2.719	3.954
3.017	0.825	2.476	3.453
1.689	0.672	5.154	2.06
1.79	0.743	6.212	2.122
3.348	1.239	7.046	2.104
1.924	1.368	10.767	2.036
1.986	1.432	9.851	3.208
2.317	1.071	4.92	3.968
2.613	1.204	5.68	5.072
3.376	1.141	4.401	3.161
0.903	1.245	4.982	2.551
1.119	0.905	7.803	3.049
1.393	1.163	8.739	3.342
1.213	1.315	6.19	3.384
1.208		3.568	3.018
1.189		3.654	3.674
1.178		2.087	1.357
1.114		2.479	1.937
1.074		4.887	3.387
0.657		4.647	2.254
0.831		4.226	1.825
		4.314
		3.71
		3.887
		3.771
		4.557
		2.677
		3.24
		3.253
		1.479
		1.622
		2.328
		1.868

## Sheet: Fig.4 original data
Figure 4, Original data
FDG uptake/Macrophage (%Idxkg/m^2/%)			FDG uptake/Pimonidazole (%Idxkg/m^2/%)
non-diabetic	diabetic		non-diabetic	diabetic
0.6338	0.183367		0.933751	0.275429
0.451191	0.218443		0.5636	0.296146
0.388657	0.267363		0.576835	0.311018
0.710217	0.42323		3.13045	0.438972
0.329501	0.172864		0.424435	0.266119
0.518293	0.165371		0.907242	0.210173
0.433206	0.199798		0.756343	0.289463
0.488984	0.388177		0.963303	0.469005
0.300233	0.123651		0.648047	0.343036
0.235744	0.140903		0.431464	0.202055
0.428937	0.0838498		0.560467	0.367138
0.224736	0.311953		0.298227	0.358849
0.249696	0.290063		0.438108	0.3963
0.129718	0.128339		0.186698	0.24796
0.158603	0.480666		0.211119	1.76392
0.140306	0.139463		0.189724	0.208297
0.210051	0.19042		0.257813	0.258051
0.0698575	0.138767		0.101279	0.187894
0.164821	0.0891165		0.827872	0.0944366
0.216832	0.10224		0.331646	0.1822
0.605199	0.0944498		1.08881	0.162706
0.314139	0.209769		0.402344	0.366951
0.261866	0.161315		0.344158	0.237837
0.393767	0.21489		1.136	0.26667
0.254979	0.194999		0.392219	0.254882
0.137525	0.25856		0.160733	0.499008
0.1109	0.221937		0.17024	0.454591
0.383992	0.172147		0.39428	0.176485
0.311162	0.21097		0.365506	0.254068
0.194124	0.130968		0.225746	0.222795
0.067558	0.139362		1.25746	0.218158
0.152936	0.1454		0.654765	0.209779
0.234642	0.176769		0.456659	0.318121
0.153627	0.256544		0.75081	0.403255
0.136178	0.0732673		0.249264	0.108525
0.154271	0.0436745		0.528614	0.0794136
0.113045	0.0366456		1.00811	0.0682733
3.47588	0.0376857		9.57392	0.0615658
0.128819	0.0275675		13.7867	0.0983865
0.236014	0.0911679		23.6602	0.115413
0.118516	0.0756496		0.283014	0.142157
0.131995	0.0448719		25.1384	0.0651727
0.180853	0.0570124		0.645079	0.0689168
0.230155	0.0561449		1.2113	0.0590759
0.321721	0.036425		1.54545	0.0573384
0.172908	0.0293918		0.493587	0.037166
0.217658	0.0334802		0.578182	0.0347131
0.252004	0.0351129		0.605348	0.0413671
0.207077	0.0557545		0.526369	0.0696096
0.391788	0.0599764		1.11262	0.0672196
0.168474	0.103393		0.290964	0.115901
0.126786	0.0523806		0.259109	0.10342
0.136544	0.0395004		0.690342	0.0662572
0.153088	0.0498523		0.287072	0.0565568
0.236255	0.0700357		0.437916	0.0940929
0.306498	0.154833		3.2922	0.169654
0.114168	0.0709821		1.53046	0.0958871
0.141677	0.0686555		0.517437	0.0774439
0.148749	0.0516173		1.04448	0.078427
1.23851	0.0734143		0	0.0800245
0.486385	0.131055		0.883529	0.157223
0.38361	0.0799306		1.4493	0.208995
0.28487	0.089703		0.455301	0.150687
0.326379			0.729633
0.490942			0.989285
0.362236			0.469595
0.585215			1.83073
0.245801			1.45031
0.0935207			0.150912
0.160917			1.41385
0.128829			1.44342
0.938434			0
0.176727			12.3703
0.0971732			0.411245
0.220672			2.61348

## Sheet: Fig.5 original data
Figure 5, Original data
HIF-1α/Lamin A/C			HIF-1α immunopositive nuclei (/10000m^2)
non-diabetic	diabetic		non-diabetic	diabetic
7.10409	2.89082		1.65623	0.497569
4.95868	3.32118		1.42714	0.22446
5.37497	2.57468		0.680329	0.598546
7.16814	2.75808		1.32574	0.401012
8.13287	2.78212		0.147228	0.351878
			0.412013	0.405523
			0.878947	0.248606
			0.544421	0.284514
			0.0724401	0.136964
			0.442088	0.283595
			0.115474	0.379535
			1.26959	0.0451199
			0.474074	0.191082
			1.89805	0.0958592
			0.925413	0.0973183
			0.881208	0.117007
			1.12196	0.151423
			1.9887	0.120917
			0.383959	0.14672
			0.364538	0.151692
			1.75114	0.359444
			1.33127	0.339557
				0.311042
				0.14814

## Sheet: Fig.6B original data
Figure 6B, Original data
non-diabetic atherosclerotic arteries				diabetic atherosclerotic arteries
Apoptosis (/10000μm^2)	vascular area (μm^2)	Macrophage (%)		Apoptosis (/10000μm^2)	vascular area (μm^2)	Macrophage (%)
0.237863	1135107	45.9221		0.168532	1246058	34.645
0.306768	749753	52.1856		0.192394	935578	25.8537
0.259762	808433	47.9211		0.317977	534629	18.8605
0.320815	903948	54.132		0.246757	1702077	27.2932
0.0291372	686408	27.0629		0.458299	1047351	47.6111
0.0630977	475453	7.26023		1.0421	738891	24.0754
0.0686689	582505	36.3097		0.287246	591828	13.1818
0.213078	750898	10.322		0.174024	402242	18.1974
0.0759658	789830	5.29583		0.270047	2073714	41.0809
0.0241467	414136	5.91714		0.180657	1328484	40.2176
0.530505	565499	19.5597		0.0760914	657105	21.9288
0.0192456	519599	19.9321		0.124073	564184	48.3585
0.0838406	834918	64.0306		0.151814	790440	38.9919
0.152927	653906	32.7293		0.375999	1329792	43.8821
0.544732	1174891	48.8896		0.501326	1655609	47.5252
0.177207	1015763	61.6916		1.1008	2407345	55.2996
0.101678	590099	50.3049		0.205413	1460475	30.3702
0.160279	998258	47.5481		0.0973183	1849600	52.9372
0.162538	1045910	53.265		0.127644	1880234	63.4747
0.0623257	481343	14.8751		0.0553469	1084072	22.2003
0.0182838	546933	27.5782		0.227134	1056644	23.4846
0.0546807	548640	24.5908		0.164101	1157823	20.667
0.225293	976506	47.409		0.268987	817882	19.2395
0.128833	1397160	65.6689		0.265461	1054768	19.5659
				0.155747	1412544	35.8464
				0.105719	1418859	42.1181
				0.164928	1030756	39.524
				0.182966	1093099	41.7085
				0.281466	675036	21.1352
				0.223756	1296057	53.7348
